# Supplementary material for: Chitosan/poly(γ-glutamic acid) nanoparticles incorporating IFN-γ for immune response modulation in the context of colorectal cancer
Source: Royal Society of Chemistry journal article supplement (doi:10.1039/c9bm00393b), 2019-01-01

Figure S1

a.

| Sample                           | Molar Ratio<br>Ch:IFN- $\gamma$ :PGA | [IFN- $\gamma$ ]<br>ng/ml | Particle size<br>(nm) | Polydispersity  | Zeta potential<br>(mV) |
|----------------------------------|--------------------------------------|---------------------------|-----------------------|-----------------|------------------------|
| Ch/ $\gamma$ -PGA                | 1:0:1.5                              | 0                         | 295.0 $\pm$ 12.7      | 0.28 $\pm$ 0.01 | 18.1 $\pm$ 0.7         |
|                                  | 1:0.1:1.5                            | 43                        | 301.7 $\pm$ 4.6       | 0.28 $\pm$ 0.01 | 16.7 $\pm$ 1.9         |
|                                  | 1:0.25:1.5                           | 107                       | 301.2 $\pm$ 9.1       | 0.27 $\pm$ 0.01 | 18.3 $\pm$ 0.4         |
| Ch/IFN- $\gamma$ / $\gamma$ -PGA | 1:0.35:1.5                           | 150                       | 315.6 $\pm$ 8.9       | 0.28 $\pm$ 0.01 | 18.6 $\pm$ 1.4         |
|                                  | 1:0.5:1.5                            | 214                       | 319.6 $\pm$ 26.6      | 0.43 $\pm$ 0.05 | 15.5 $\pm$ 1.1         |
|                                  | 1:0.7:1.5                            | 300                       | 855.7 $\pm$ 47.5      | 0.66 $\pm$ 0.03 | -5.1 $\pm$ 0.5         |

b.

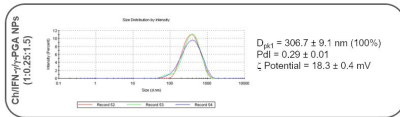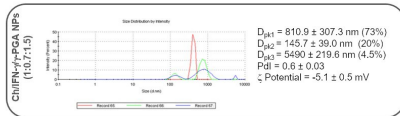

Supplement: c9bm00393b2.pdf [file c9bm00393b2.pdf]
