# Supplementary figures and images for: Chitosan/poly(γ-glutamic acid) nanoparticles incorporating IFN-γ for immune response modulation in the context of colorectal cancer
Source: Royal Society of Chemistry journal article supplement (doi:10.1039/c9bm00393b), 2019-01-01

## Figure S2

a.

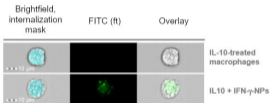

b.

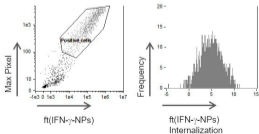

Supplement: c9bm00393b3.pdf [file c9bm00393b3.pdf]

Figure S3

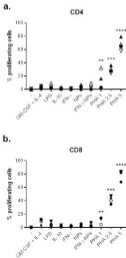

Supplement: c9bm00393b4.pdf [file c9bm00393b4.pdf]
